# Supplementary material for: Effective, Long-Term, Neutrophil Depletion Using a Murinized Anti-Ly-6G 1A8 Antibody
Source: MDPI journal article supplement (doi:10.3390/cells11213406), 2022-10-27
Supplement: s1 [file s1]

## Supplemental Figures

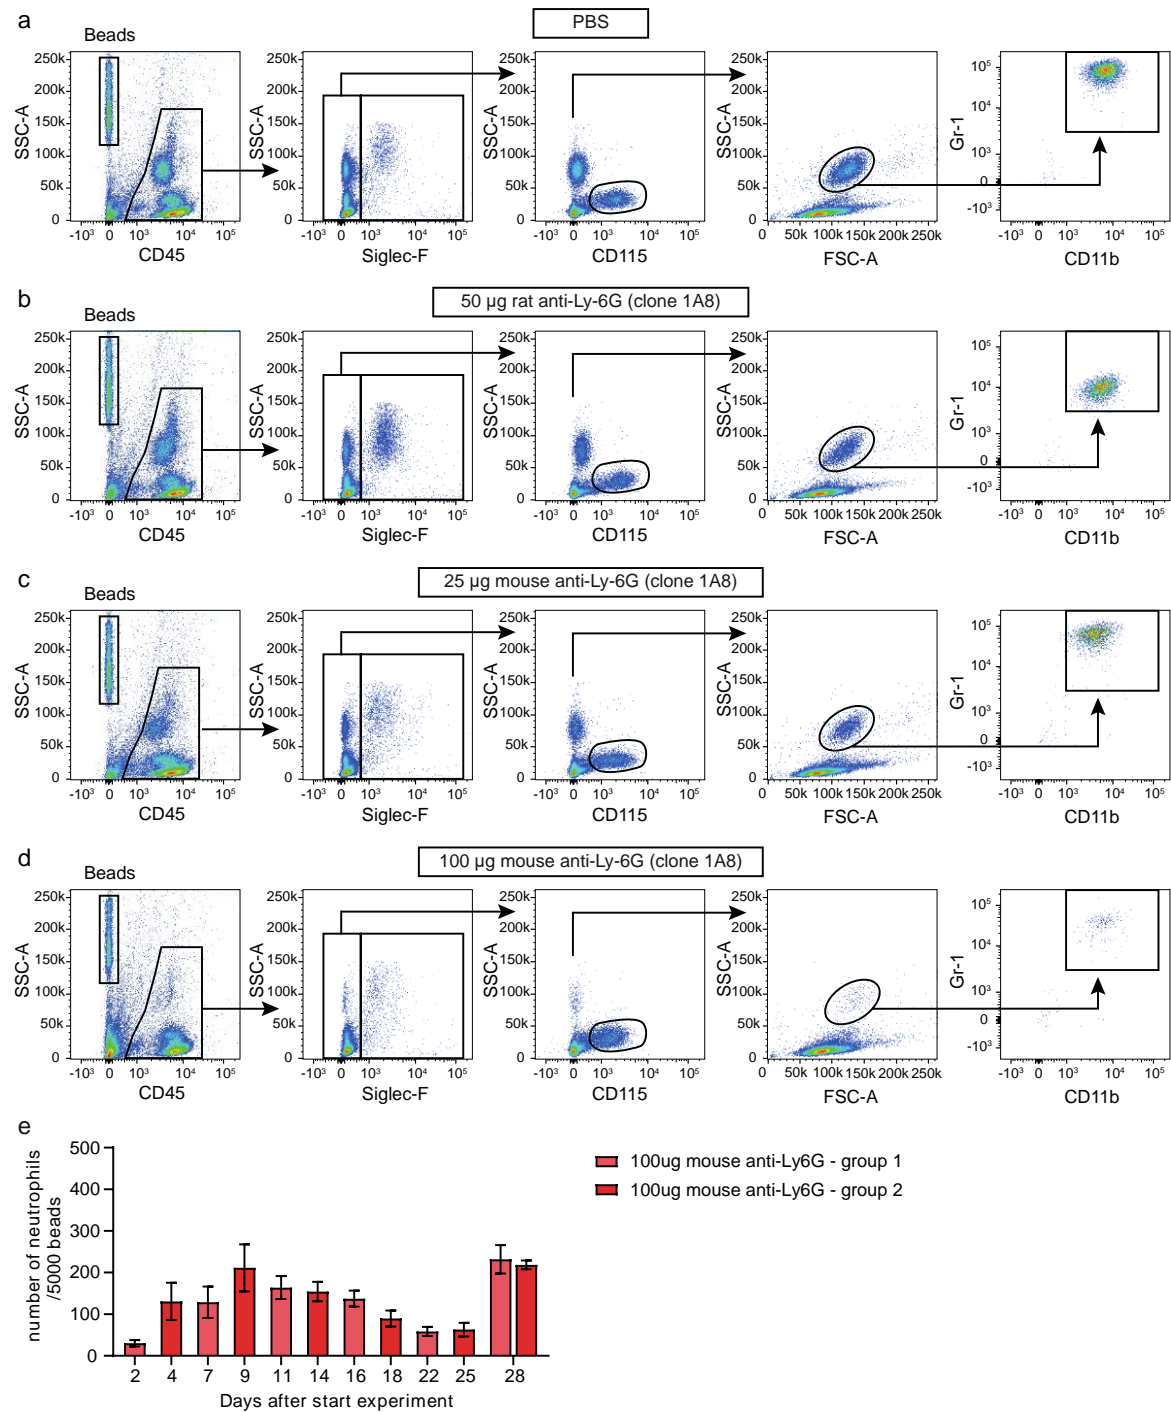

**Figure S1: Analysis of the number of neutrophils upon antibody treatment (related to Figure 1).** (a-e): FACS dot plots showing representative blood samples at day 28 after the start of the experiment for (a) PBS injected control mice, (b) 50  $\mu$ g rat-Ly-6G injected mice, (c) 25  $\mu$ g mouse-Ly-6G injected mice, and (d) 100  $\mu$ g mouse-Ly-6G injected mice. (e) Zoom in of the longitudinal analysis of the number of CD45<sup>+</sup> Siglec-F<sup>+</sup> CD115<sup>+</sup> SSC<sup>high</sup> Gr-1<sup>+</sup> CD11b<sup>+</sup> neutrophils per 5000 beads in the peripheral blood (n=4 mice per subgroup) of 100  $\mu$ g mouse-Ly-6G treated mice, as depicted in Figure 1e.

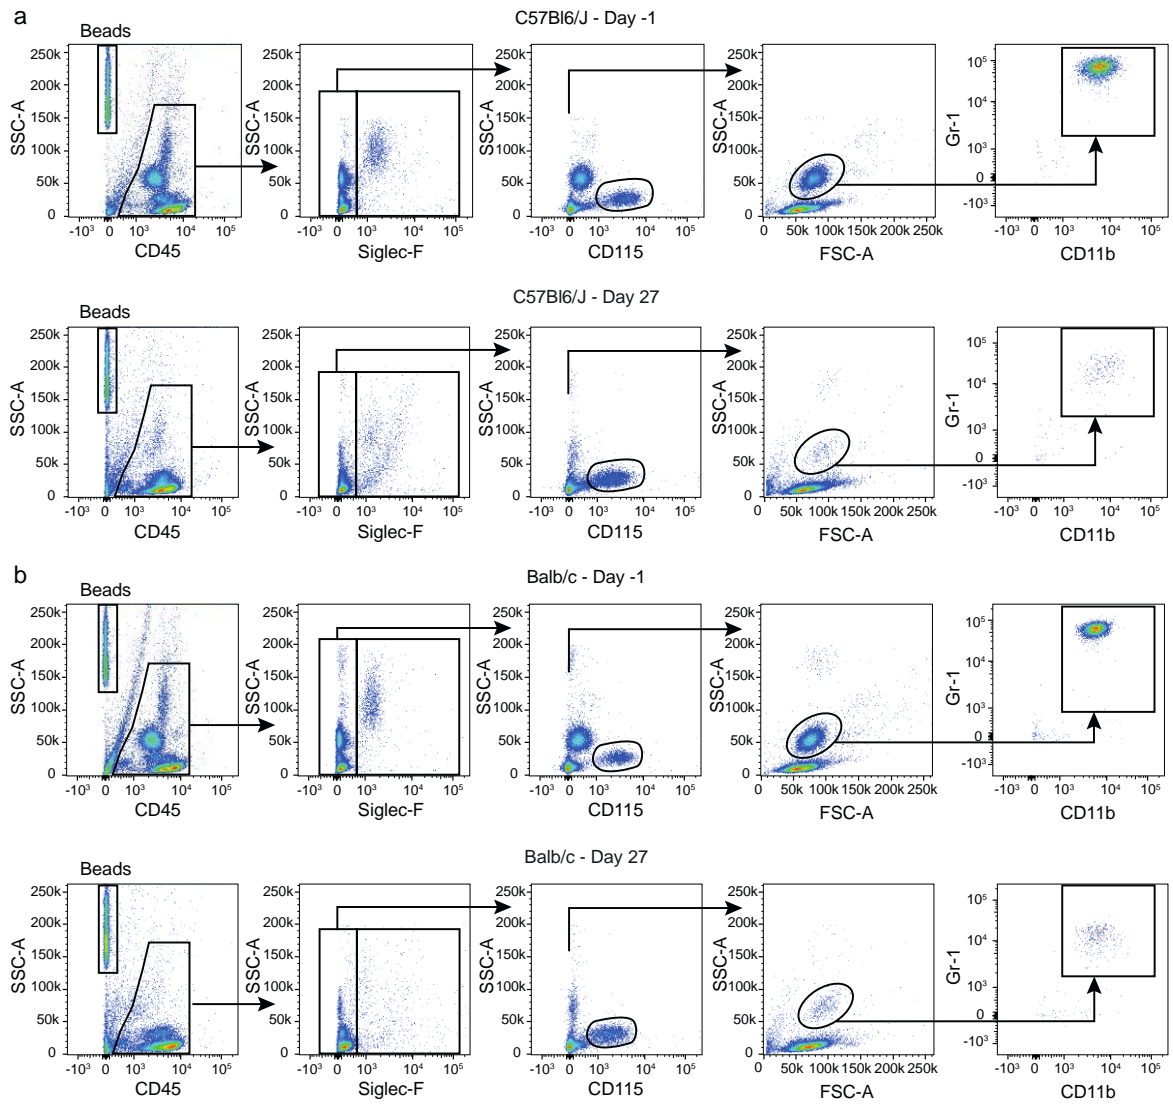

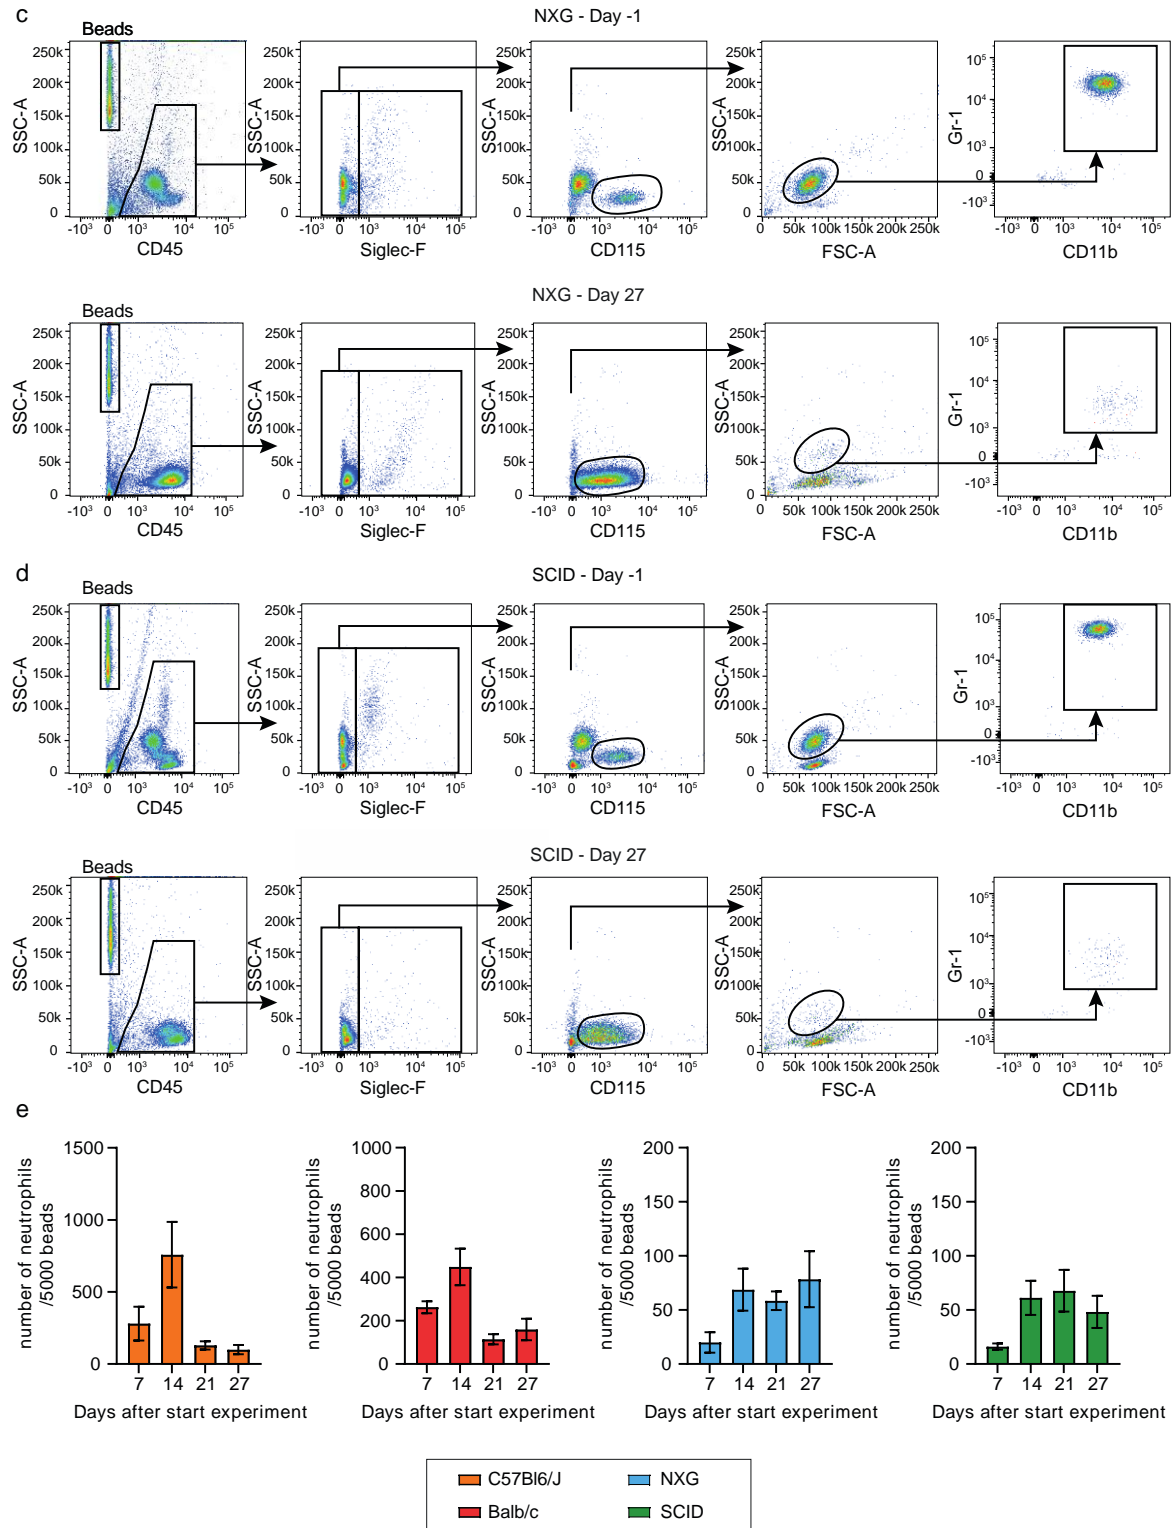

**Figure S2: Gating strategy to retrieve the number of neutrophils per 5000 beads (related to Figure 2).** (a-d): FACS dot plots showing representative blood samples at the day before the start of the experiment (day -1) and at the end of the experiment (day 27) for (a) C57Bl6/J, (b) Balb/c, (c) NXG, and (d) SCID mice, injected with 100  $\mu$ g mouse-Ly-6G. (e) Zoom in of the longitudinal analysis of the number of CD45<sup>+</sup> Siglec-F<sup>+</sup> CD115<sup>+</sup> SSC<sup>high</sup> Gr-1<sup>+</sup> CD11b<sup>+</sup> neutrophils per 5000 beads in the peripheral blood (n=5 mice per group) of 100  $\mu$ g mouse-Ly-6G treated mice, as depicted in Figure 2b.

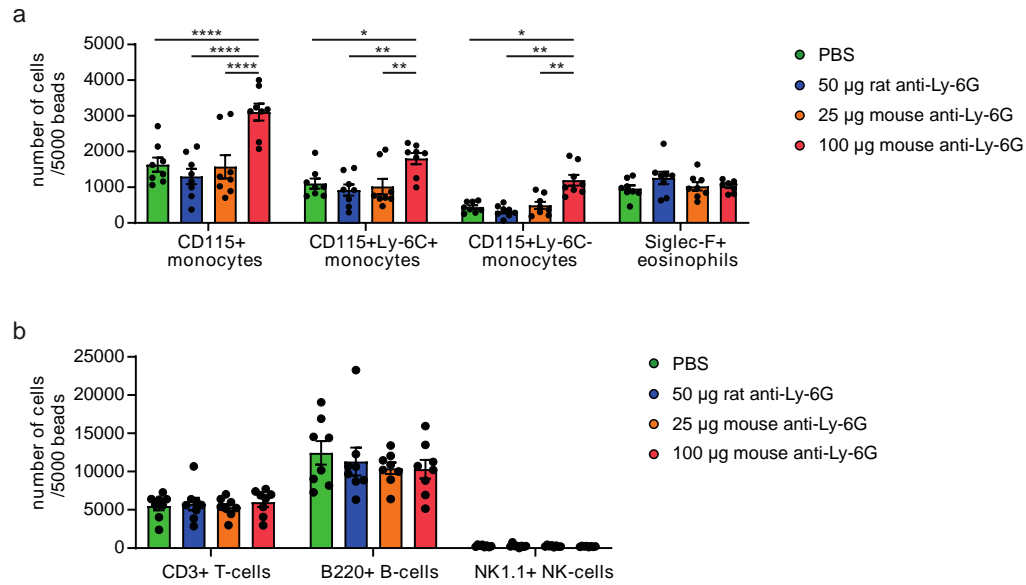

**Figure S3: Number of monocytes, eosinophils, T-, B-, and NK-cells upon Ly6g treatment (related to Figure 1).** Flow cytometry analysis of the number of leukocytes in the peripheral blood at day 28 after the start of the experiment (n=8 mice per group, as shown in Figure 1) per 5000 latex beads, showing (a): a significant increase in both Ly-6C<sup>+</sup> and Ly-6C<sup>-</sup> CD115<sup>+</sup> monocytes, but not eosinophils, upon neutrophil depletion with 100 µg mouse-Ly-6G antibody, and (b): no differences in CD3<sup>+</sup> T-cells, B220<sup>+</sup> B-cells and NK1.1<sup>+</sup> NK-cells. Statistics: two-way ANOVA with Bonferroni correction, \* $p < 0.05$ , \*\* $p < 0.01$ , \*\*\* $p < 0.001$ , \*\*\*\* $p < 0.0001$ .
